# Supplementary material for: Prevalence and Risk Factors Associated with Multidrug Resistance and Extended-Spectrum β-lactamase Producing E. coli Isolated from Healthy and Diseased Cats
Source: MDPI journal article supplement (doi:10.3390/antibiotics12020229), 2023-01-20
Supplement: s1 [file s1]

**Table S1:** Primers, product size and annealing temperatures used in the present study to identify virulence and antimicrobial resistance genes.

| Gene                          | Primer sequences                                                      | Product size (bp) | Annealing (°C) | References |
|-------------------------------|-----------------------------------------------------------------------|-------------------|----------------|------------|
| <i>bla</i> <sub>CTX-M-1</sub> | fw: GAC GAT GTC ACT GGC TGA GC<br>rev: AGC CG C CGA CGC TAA TAC A     | 499               | 55             | [65]       |
| <i>bla</i> <sub>CTX-M-2</sub> | fw: GCG ACC TGG TTA ACT ACA ATC C<br>rev: CGG TAG TAT TGC CCT TAA GCC | 351               | 55             |            |
| <i>bla</i> <sub>CTX-M-3</sub> | fw: CGC TTT GCC ATG TGC AGC ACC<br>rev: GCT CAG TAC GAT CGA GCC       | 307               | 55             |            |
| <i>bla</i> <sub>CTX-M-4</sub> | fw: GCT GGA GAA AAG CAG CGG AG<br>rev: GTA AGC TGA CGC AAC GTC TG     | 474               | 62             |            |
| <i>bla</i> <sub>SHV</sub>     | fw: CACTCAAGGATGTATTGTG<br>rev: TTAGCGTTGCCAGTGCTCG                   | 885               | 50             | [63]       |
| <i>bla</i> <sub>TEM</sub>     | fw: TCGGGGAAATGTGCGCG<br>rev: TGCTTAATCAGTGAGGCACC                    | 971               | 50             |            |
| <i>stx1</i>                   | fw: AAATCGCCATTCGTTGACTACTTCT<br>rev: TGCCATTCTGGCAACTCGCGATGCA       | 370               | 60             | [62]       |
| <i>stx2</i>                   | fw: CAGTCGTCACCTCACTGGTTTCATCA<br>rev: GGATATTCTCCCCACTCTGACACC       | 283               | 60             |            |
| <i>eaeA</i>                   | fw: CCCGAATTCGGCACAAGCATAAGC<br>rev: CCCGGATCCGTCTCGCCAGTATTCG        | 863               | 52             | [64]       |
| <i>hlyA</i>                   | fw: GGTGCAGCAGAAAAAGTTGTAG<br>rev: TCTCGCCTGATAGTGTTTGGTA             | 1551              | 57             |            |

**Table S2.** Description of variables collected from both healthy and diseased cats.

| Factors                                   | Categories                  | Total      | Healthy cats<br>(n = 209) |             | Diseased cats<br>(n = 191) |             |
|-------------------------------------------|-----------------------------|------------|---------------------------|-------------|----------------------------|-------------|
|                                           |                             |            | Frequency                 | %           | Frequency                  | %           |
| <b>Cat sex</b>                            |                             |            |                           |             |                            |             |
|                                           | Female                      | 227        | 131                       | 62.7        | 96                         | 50.3        |
|                                           | Male                        | 173        | 78                        | 37.3        | 95                         | 49.7        |
| <b>Cat breed</b>                          |                             |            |                           |             |                            |             |
|                                           | Himalayan                   | 59         | 15                        | 7.2         | 44                         | 23.0        |
|                                           | Persian                     | 162        | 106                       | 50.7        | 56                         | 29.3        |
|                                           | Birman                      | 53         | 21                        | 10.1        | 32                         | 16.8        |
|                                           | Siamese                     | 112        | 64                        | 30.6        | 48                         | 25.1        |
|                                           | Egyptian Mau                | 10         | 3                         | 1.4         | 7                          | 3.7         |
|                                           | Arabian Mau                 | 4          | --                        | --          | 4                          | 2.1         |
| <b>Family use antimicrobials</b>          |                             |            |                           |             |                            |             |
|                                           | No                          | 308        | 177                       | 84.7        | 131                        | 68.6        |
|                                           | Yes                         | 92         | 32                        | 15.3        | 60                         | 31.4        |
| <b>Family member with acne</b>            |                             |            |                           |             |                            |             |
|                                           | No                          | 282        | 150                       | 71.8        | 132                        | 69.1        |
|                                           | Yes                         | 118        | 59                        | 28.2        | 59                         | 30.9        |
| <b>Hospitalization</b>                    |                             |            |                           |             |                            |             |
|                                           | No                          | 334        | 188                       | 89.9        | 146                        | 76.4        |
|                                           | Yes                         | 66         | 21                        | 10.1        | 45                         | 23.6        |
| <b>Previous antimicrobial use for cat</b> |                             |            |                           |             |                            |             |
|                                           | No                          | 238        | 144                       | 68.9        | 94                         | 49.2        |
|                                           | Yes                         | 162        | 65                        | 31.1        | 97                         | 50.8        |
| <b>Current antimicrobials use for cat</b> |                             |            |                           |             |                            |             |
|                                           | No                          | 384        | 208                       | 99.5        | 176                        | 92.2        |
|                                           | Yes                         | 16         | 1                         | 0.5         | 15                         | 7.8         |
| <b>Child at home</b>                      |                             |            |                           |             |                            |             |
|                                           | No                          | 205        | 99                        | 47.4        | 106                        | 55.5        |
|                                           | Yes                         | 195        | 110                       | 52.6        | 85                         | 44.5        |
| <b>Cat living</b>                         |                             |            |                           |             |                            |             |
|                                           | Indoors                     | 133        | 78                        | 37.3        | 55                         | 28.8        |
|                                           | Indoors-outdoors            | 267        | 131                       | 62.7        | 136                        | 71.2        |
| <b>Reason being at clinic</b>             |                             |            |                           |             |                            |             |
|                                           | Vaccination and/or grooming | 209        | 207                       | 99.0        | 2                          | 1.1         |
|                                           | Treatment                   | 191        | 2                         | 1.0         | 189                        | 98.9        |
| <b>Cat care</b>                           |                             |            |                           |             |                            |             |
|                                           | Adult male                  | 116        | 53                        | 25.4        | 63                         | 33.0        |
|                                           | Adult female                | 192        | 93                        | 44.5        | 99                         | 51.8        |
|                                           | Child                       | 18         | 12                        | 5.7         | 6                          | 3.1         |
|                                           | All family                  | 74         | 51                        | 24.4        | 23                         | 12.1        |
| <b>diet type</b>                          |                             |            |                           |             |                            |             |
|                                           | Dry                         | 263        | 137                       | 65.6        | 126                        | 66.0        |
|                                           | Semi-moist                  | 2          | 2                         | 1.0         | --                         | --          |
|                                           | Wet                         | 53         | 23                        | 11.0        | 30                         | 15.7        |
|                                           | Raw uncooked                | 35         | 30                        | 14.3        | 5                          | 2.6         |
|                                           | Home available              | 47         | 17                        | 8.1         | 30                         | 15.7        |
| <b>Total</b>                              |                             | <b>400</b> | <b>209</b>                | <b>52.3</b> | <b>191</b>                 | <b>47.7</b> |
